# Supplementary figures and images for: Incidence and prevalence of multiple sclerosis in the UK 1990–2010: a descriptive study in the General Practice Research Database
Source: PubMed Central journal article supplement — J Neurol Neurosurg Psychiatry. 2013 Sep 19;85(1):76–84. doi: 10.1136/jnnp-2013-305450 (PMC3888639; doi:10.1136/jnnp-2013-305450), 2013-09-19

Supplementary figure 1a

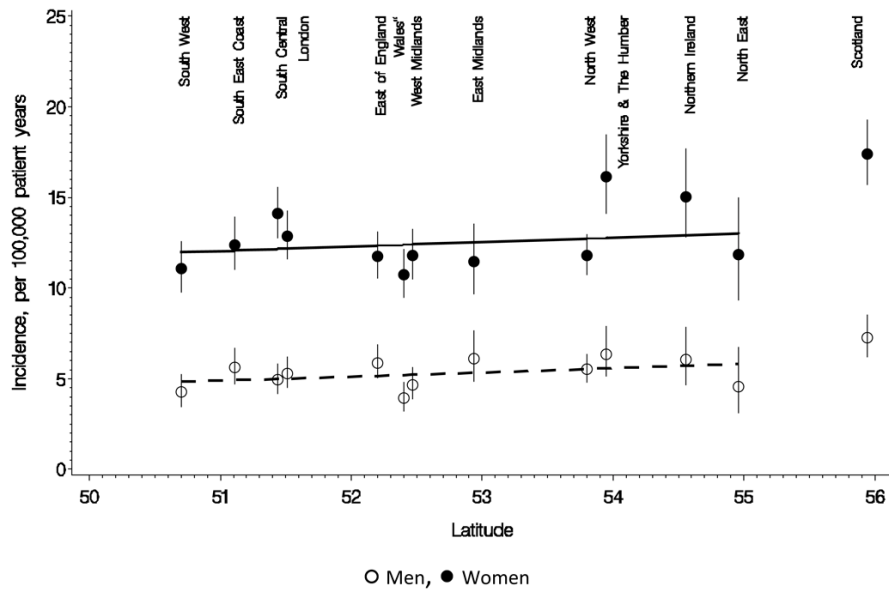

Supplementary figure 1b

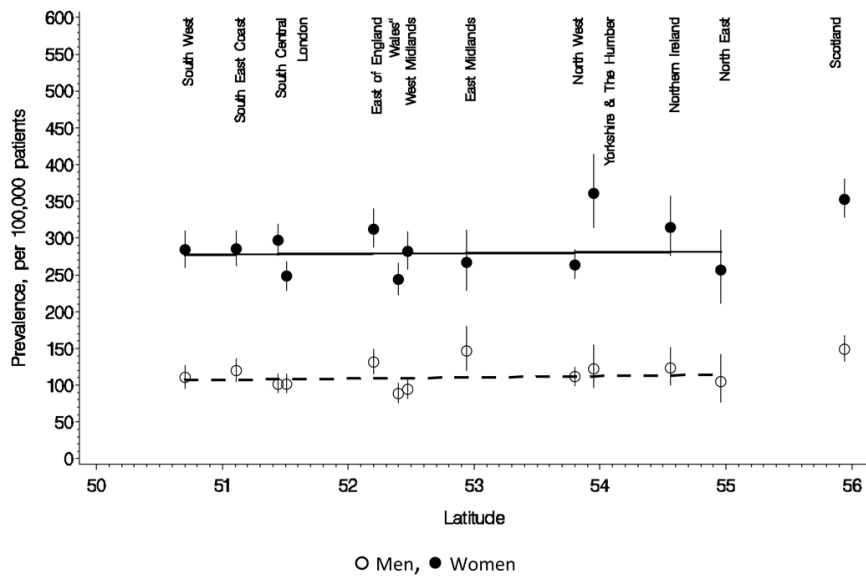

Supplement: jnnp-2013-305450-s1.pdf [file jnnp-2013-305450-s1.pdf]
